# Supplementary material
Source: MDPI journal article supplement (https://www.mdpi.com/2220-9964/11/1/49)
Supplement: s1 [file s1]

## Supplementary Information

# Spatial Evolution of Coastal Tourist City Using the Dyna-CLUE Model in Koh Chang of Thailand during 1990–2050

Katawut Waiyasusri <sup>1</sup> and Srilert Chotpantarat <sup>2,3\*</sup>

<sup>1</sup> Geography and Geo-Informatics Program, Faculty of Humanities and Social Sciences, Suan Sunandha Rajabhat University, 1 U-Thong Nok Road, Dusit, Bangkok 10300 Thailand; katawut.wa@ssru.ac.th

<sup>2</sup> Department of Geology, Faculty of Science, Chulalongkorn University, Phayathai Road, Pathumwan, Bangkok 10330, Thailand; Srilert.C@chula.ac.th

<sup>3</sup> Research Unit of Green Mining (GMM), Environmental Research Institute, Chulalongkorn University, Bangkok, Thailand

\* Correspondence: katawut.wa@ssru.ac.th; Srilert.C@chula.ac.th

**Table S1.** Confusion matrix of land-use classification in 1990

| Reference map           | Classified map |       |       |       |       |       | Error of Omission | Producer's Accuracy (%) |
|-------------------------|----------------|-------|-------|-------|-------|-------|-------------------|-------------------------|
|                         | F              | A     | U     | R     | M     | Total |                   |                         |
| F                       | 172            | 0     | 15    | 5     | 25    | 217   | 20.74             | 79.26                   |
| A                       | 28             | 165   | 12    | 10    | 14    | 229   | 27.95             | 72.05                   |
| U                       | 11             | 10    | 162   | 15    | 19    | 217   | 25.35             | 74.65                   |
| R                       | 9              | 8     | 17    | 180   | 18    | 232   | 22.41             | 77.59                   |
| M                       | 5              | 4     | 5     | 8     | 190   | 212   | 10.38             | 89.62                   |
| Total                   | 225            | 187   | 211   | 218   | 266   | 1107  |                   |                         |
| Error of Commission     | 23.56          | 11.76 | 23.22 | 17.43 | 28.57 |       |                   |                         |
| Consumer's Accuracy (%) | 76.44          | 88.24 | 76.78 | 82.57 | 71.43 |       |                   |                         |
| Overall Accuracy        | 78.5           |       |       |       |       |       |                   |                         |
| Kappa coefficient       | 0.74           |       |       |       |       |       |                   |                         |

<sup>1</sup> F = Forest land, A = Agricultural land, U = Urban and built-up land, R = Recreation area, and M = Miscellaneous land

**Table S2.** Confusion matrix of land-use classification in 2005

| Reference map           | Classified map |       |       |       |       |       | Error of Omission | Producer's Accuracy (%) |
|-------------------------|----------------|-------|-------|-------|-------|-------|-------------------|-------------------------|
|                         | F              | A     | U     | R     | M     | Total |                   |                         |
| F                       | 186            | 15    | 9     | 10    | 10    | 230   | 19.13             | 80.87                   |
| A                       | 10             | 181   | 5     | 6     | 10    | 212   | 14.62             | 85.38                   |
| U                       | 15             | 1     | 186   | 15    | 24    | 241   | 22.82             | 77.18                   |
| R                       | 6              | 6     | 12    | 175   | 8     | 207   | 15.46             | 84.54                   |
| M                       | 10             | 20    | 8     | 7     | 185   | 230   | 19.57             | 80.43                   |
| Total                   | 227            | 223   | 220   | 213   | 237   | 1120  |                   |                         |
| Error of Commission     | 18.06          | 18.83 | 15.45 | 17.84 | 21.94 |       |                   |                         |
| Consumer's Accuracy (%) | 81.94          | 81.17 | 84.55 | 82.16 | 78.06 |       |                   |                         |
| Overall Accuracy        | 81.5           |       |       |       |       |       |                   |                         |
| Kappa coefficient       | 0.77           |       |       |       |       |       |                   |                         |

<sup>1</sup> F = Forest land, A = Agricultural land, U = Urban and built-up land, R = Recreation area, and M = Miscellaneous land

**Table S3.** Confusion matrix of land-use classification in 2020

| Reference map           | Classified map |       |       |       |       |       | Error of Omission | Producer's Accuracy (%) |
|-------------------------|----------------|-------|-------|-------|-------|-------|-------------------|-------------------------|
|                         | F              | A     | U     | R     | M     | Total |                   |                         |
| F                       | 205            | 1     | 4     | 13    | 5     | 228   | 10.09             | 89.91                   |
| A                       | 14             | 211   | 7     | 10    | 8     | 250   | 15.60             | 84.40                   |
| U                       | 6              | 16    | 224   | 1     | 5     | 252   | 11.11             | 88.89                   |
| R                       | 18             | 3     | 13    | 213   | 11    | 258   | 17.44             | 82.56                   |
| M                       | 9              | 5     | 1     | 6     | 215   | 236   | 8.90              | 91.10                   |
| Total                   | 252            | 236   | 249   | 243   | 244   | 1224  |                   |                         |
| Error of Commission     | 18.65          | 10.59 | 10.04 | 12.35 | 11.89 |       |                   |                         |
| Consumer's Accuracy (%) | 81.35          | 89.41 | 89.96 | 87.65 | 88.11 |       |                   |                         |
| Overall Accuracy        | 87.3           |       |       |       |       |       |                   |                         |
| Kappa coefficient       | 0.84           |       |       |       |       |       |                   |                         |

<sup>1</sup> F = Forest land, A = Agricultural land, U = Urban and built-up land, R = Recreation area, and M = Miscellaneous land

**Table S4.** Matrix of LUC in the Koh Chang area, 1990-2005 (km<sup>2</sup>).

| LUC  |       | 2005   |       |      |      |      | Changing area |                   |
|------|-------|--------|-------|------|------|------|---------------|-------------------|
|      |       | F      | A     | U    | R    | M    | Total         | km <sup>2</sup> % |
| 1990 | F     | 171.19 | 10.10 | 2.34 | 0.25 | 0.95 | 184.83        | -6.15    -3.35    |
|      | A     | 7.02   | 12.62 | 3.71 | 0.29 | 0.42 | 24.06         | -0.75    -18.50   |
|      | U     | 0.33   | 0.49  | 0.57 | 0.01 | 0.06 | 1.46          | 5.30    486.99    |
|      | R     | 0.01   | 0.00  | 0.01 | 0.06 | 0.01 | 0.09          | 0.52    2944.44   |
|      | M     | 0.13   | 0.10  | 0.13 | 0.00 | 0.30 | 0.66          | 1.08    133.33    |
|      | Total | 178.68 | 23.31 | 6.76 | 0.61 | 1.74 | 0.00          |                   |

**Table S5.** Matrix of LUC in the Koh Chang area, 2005-2020 (km<sup>2</sup>).

| LUC  |       | 2020   |       |      |      |      | Changing area |                   |
|------|-------|--------|-------|------|------|------|---------------|-------------------|
|      |       | F      | A     | U    | R    | M    | Total         | km <sup>2</sup> % |
| 2005 | F     | 177.15 | 0.54  | 0.92 | 0.07 | 0.00 | 178.68        | 0.03    -3.35     |
|      | A     | 0.97   | 18.84 | 3.15 | 0.34 | 0.01 | 23.31         | -3.70    -18.50   |
|      | U     | 0.47   | 0.14  | 4.32 | 1.83 | 0.00 | 6.76          | 1.81    486.99    |
|      | R     | 0.01   | 0.05  | 0.07 | 0.48 | 0.00 | 0.61          | 2.13    2944.44   |
|      | M     | 0.11   | 0.04  | 0.11 | 0.02 | 1.46 | 1.74          | -0.27    133.33   |
|      | Total | 178.71 | 19.61 | 8.57 | 2.74 | 1.47 | 0.00          |                   |
